# Supplementary material
Source: MDPI journal article supplement (https://www.mdpi.com/1996-1073/13/16/4136)
Supplement: s1 [file s1]

# Roadmap for Decarbonization of the Building and Construction Industry—A Supply Chain Analysis Including Primary Production of Steel and Cement

Ida Karlsson <sup>1,\*</sup>, Johan Rootzén <sup>2</sup>, Alla Toktarova <sup>1</sup>, Mikael Odenberger <sup>1</sup>, Filip Johnsson <sup>1</sup> and Lisa Göransson <sup>1</sup>

<sup>1</sup> Department of Space, Earth and Environment, Chalmers University of Technology, SE-412 96 Gothenburg, Sweden; alla.toktarova@chalmers.se (A.T.); mikael.odenberger@chalmers.se (M.O.); filip.johnsson@chalmers.se (F.J.); lisa.goransson@chalmers.se (L.G.)

<sup>2</sup> Department of Economics, University of Gothenburg, SE-405 30 Gothenburg, Sweden; johan.rootzen@economics.gu.se

\* Correspondence: ida.karlsson@chalmers.se

Received: 2 July 2020; Accepted: 3 August 2020; Published: 10 August 2020

## 1. Cement/ Concrete Production and Use

The cement clinker production is responsible for the majority of GHG emissions related to concrete use with the main current emission abatement options comprising of reducing the binder intensity (amount of cement or cement substitutes) in concrete, reducing the amount of cement clinker by using alternative binders (i.e., waste-based or natural supplementary cementitious materials) and replacing fuels in the cement manufacturing process with waste- or bio-based fuels [1]. The only Swedish cement producer Cementa, is a frontrunner when it comes to alternative fuels with biofuels and waste-based alternative fossil fuels (e.g., plastic waste, tires, and solvents) together making up around 70% of the fuels for its kilns in 2017 [2]. In contrast Sweden is behind the rest of Europe in using alternative binders. While the average share of clinker in cement in Europe is 73% [3], Swedish cement production has an average clinker content of 86% [4].

Partly explained by regulations, national standards and norms historically being more restrictive [5,6], adoption of concrete with cement clinker substitutes is a key measure requiring further attention. However, as the main alternative binders used at current, i.e., fly ash from coal power production and blast furnace slag from steel production [7], are both set to reduce as coal power production is phased out and primary steel production is converted, the use of alternative SCMs, such as agricultural ashes and calcined clays, will need to be upscaled [3,8–10].

Regarding optimization of concrete recipes, there is often 20–30% more cement in the concrete mix today than what is required by standards, which occurs for two reasons: over-specification of cement by concrete producers, and higher exposure classes for the concrete than the situation demands [3]. In Sweden, we are also facing an additional issue in that faster construction processes have led to highly set drying requirements, for example for slabs covered with plastic or parquet flooring concrete with very high cement content are used.

As a result, the average cement/binder content used in concrete is higher in Sweden than in other countries, with around 420 kg binder per m<sup>3</sup> concrete compared to an average 400 kg binder per m<sup>3</sup> concrete in Europe overall [11–13]. There is thus a large potential for the cement demand to be reduced by changing construction production planning to suit new cement types, adjust concrete recipes depending on the specified flooring and add a screed layer or apply floating flooring solutions to create a buffer zone between concrete and flooring [14].

Other prominent abatement options include design optimization to slim constructions, increased prefabrication to reduce waste and minimize construction process emissions, together with material substitutions towards wood-based solutions [15]. For building construction in particular, the development of engineered wood products, such as cross-laminated timber (CLT), laminated veneer lumber (LVL), and glued laminated wood (glulam), have enabled increased adoption of construction with a structural core of timber, predominantly for low- and medium-rise buildings [16], with recent examples also of high-rise buildings [17,18]. Indeed, engineered wood products have recently experienced annual growth rates between 2.5% and

15% [19], with future penetration levels highly uncertain, ranging from conservative expectations of 5% substitution from concrete to wood [15] to estimates of 50% to 80% of all new multi-family houses being built with wood in 2025 and 2050, respectively [20,21] (compared to the current rate of 13% multi-family buildings built in wood in Sweden [22]). A growth rate of 5% has been assumed in this study, leading to the share of new multi-family buildings constructed in 2050 being close to 60%.

In terms of the impact of upscaling of structural timber on harvesting levels, a recent Swedish study demonstrates that an annual growth rate of 2% increase in the share of wood framed multi-family buildings would in 2050 correspond to less than half the yearly amount of biomass that Swedish forests can produce [23], while, on a European scale, a calculation was made to suggest that if the entire European population would live in a wood-frame apartment, approximately 40–50 million hectares of forest would be required renew those buildings every 50 years, representing about 25–30% of Europe's forests with current management and harvest levels [18]. On a global level however, the annual volume of concrete used in the world is about ten times greater than the global forest harvesting rate [24].

A range of studies have shown that buildings with wooden structures require less energy and emit less CO<sub>2</sub> during their life cycle than buildings with other types of structures (see reviews in, e.g., Reference [25–29]). For wood products to have a low carbon footprint [7], the main prerequisite is sustainable forestry, which from a CO<sub>2</sub> perspective, implies that the managed forest must capture more CO<sub>2</sub> per year and area than does an equivalent standing forest [30,31]. LCA studies in general presume that this prerequisite is safeguarded and thus consider wood products to be carbon neutral over the lifecycle of a building, while this assumption along with considerations of long-lived wood products being considered as a temporary carbon sink being discussed heavily in literature of late [32–36].

While timber has a strength parallel to grain similar to that of reinforced concrete, timber has a low density compared with conventional structural materials [18]. On the other hand, using wood as a structural material often has the consequence of introducing other materials to achieve certain performance requirements, including gypsum boards for fire resistance [18]. We thus calculate that a structural core of timber requires on average 10% of the weight of a similar structure made of concrete, but an additional 7% plasterboard, based on data found in [23,37–40].

However, even if current abatement options are combined to its full potential, transformative technologies are still required to reach the goal of close to or net zero emissions in the cement industry by 2045. Carbon capture technologies (CCS) with or without electrification of the cement kilns are the key deep decarbonization alternatives. The Swedish cement industry roadmap is targeting climate neutrality by 2030, with the main focus being on biofuels together with CCS [4]. However, Cementa is also pursuing electrification together with Vattenfall through its CemZero project, with a pre-feasibility study released in 2018 [41]. Even with electrification or using biomass to abate the energy related emissions, process emissions remain, and CCS still needs to be applied. However, the electrification serves to purify the flue gas streams which eases CO<sub>2</sub> capture.

In terms of CCS there are two main options, where CO<sub>2</sub> can be either captured after being generated in the cement kiln (post combustion capture technologies) or purified from kiln flue gases by applying combustion with oxygen instead of in air (oxy-fuel capture technologies) [10,42]. Post-combustion capture technologies do not require fundamental modifications of cement kilns and could be applied to existing facilities provided there is enough physical space available on the site. These technologies include scrubbing of CO<sub>2</sub> in flue gases using solvents, such as amine solutions, or capturing CO<sub>2</sub> via a calcium looping cycle using lime-based sorbents [8,43]. Oxyfuel combustion requires more or less a new plant, as well as an air separation unit (ASU), for the production of oxygen [42,44].

Applying carbon capture only in the precalciner has a higher technical maturity than applying carbon capture in the cement kiln. While the capture rate is lower, at about 60%, it provides an important early capture opportunity and has the potential of reducing the energy penalty associated with the captured due to use of waste heat recovery [8,42,45]. Implementing carbon capture technologies in both the precalciner and the kiln could typically achieve 85–90% avoidance of onsite CO<sub>2</sub> emissions [43,46].

Oxy-fuel capture technologies require process modifications but are in general expected to have lower energy consumption and costs than post combustion capture using scrubbing technologies [43,47,48]. However, while some pilot plant projects for post combustion capture with amine scrubbing are underway, for example, in Norway [49], both calcium looping and oxyfuel technologies are still at the early development stage when it comes to cement application (while oxyfuel has been tested at pilot scale in power plant

application) [50]. Details of the emission reduction measures for cement and concrete are found in Table S1, while further details and analysis of the emissions, energy and cost implications for the Swedish cement industry can be found in a recent technical report by Karlsson et al. [51].

**Table S1.** Overview of emission reduction measures for cement and concrete described in literature together with the described time aspect of implementation (if available). (Emissions reductions measures in italic have not been included in the pathway analysis.)

| Emission Reduction Measures                                                                                                                               | Reduction Potential Identified <sup>1</sup>                                                                                                                                                                                                                      | Time Aspect of Implem-Entation <sup>2</sup> | Additional References |
|-----------------------------------------------------------------------------------------------------------------------------------------------------------|------------------------------------------------------------------------------------------------------------------------------------------------------------------------------------------------------------------------------------------------------------------|---------------------------------------------|-----------------------|
| Use of wood as structural building construction material                                                                                                  | 5% [15]<br>5–10% [19]<br>22% [52]<br>32% [53]<br>34–69% [17]<br>9–48% [25]<br>42–61% [28]                                                                                                                                                                        |                                             |                       |
| <i>Use of alternative bridge construction materials (e.g., wood, composites)</i>                                                                          | 9%; Timber [54]<br>19–31%; Timber [55]<br>34%; Soil-steel composite [56]<br>48%; Composite [57]                                                                                                                                                                  | 2025/<br>2030-                              |                       |
| <i>Reuse of concrete elements</i>                                                                                                                         | 4% [15]<br>9% [58]<br>10–20% including cement recycling [3]                                                                                                                                                                                                      | Now/2025-                                   |                       |
| Reduced binder intensity—Use of optimized concrete recipe                                                                                                 | 4–9% [6]<br>10% [59]<br>20% [3]<br>26–33% [15]                                                                                                                                                                                                                   | Now-                                        |                       |
| Reduced overspecification of concrete—Adherence to standards                                                                                              | 9% [3]<br>11–18% [15]                                                                                                                                                                                                                                            | Now/<br>2025-                               |                       |
| Design optimization                                                                                                                                       | 10% [58]<br>10% [59]<br>11% [60]<br>13% [15]<br>14% [61]<br>15% [6]<br>30% including recipe optimization [62]<br>33% [9]<br>20–40% [3]                                                                                                                           | Now/<br>2025-                               | [9,63,64]             |
| Precast/prefabricated concrete                                                                                                                            | 3% [65]<br>3–4% [66]<br>14% [9]<br>15% [66]                                                                                                                                                                                                                      | Now-                                        |                       |
| Concrete with traditional cement clinker substitutes (e.g., fly ash, granulated blast furnace slag, GGBS), according to current standards ( $\leq 35\%$ ) | 9–35% [67]<br>13–15%; Fly ash [68]<br>22%; GGBS [68]<br>8–10%; 20% GGBS [6]<br>23%; 6–20% fly ash [69]<br>26%; 20% fly ash [70]<br>8–15%; 35% fly ash [6]<br>12–21%; 35% GGBS [6]<br>24%; 34% [1]<br>25%; 35% fly ash [71]<br>38%; 33% GGBS, 5% ground lime [72] | Now-                                        | [8,54,64,74,75]       |

|                                                                                       |                                                                                                                                                                                                                                                                                                          |                |              |
|---------------------------------------------------------------------------------------|----------------------------------------------------------------------------------------------------------------------------------------------------------------------------------------------------------------------------------------------------------------------------------------------------------|----------------|--------------|
|                                                                                       | 41%; 35% fly ash, 5% ground lime [73]                                                                                                                                                                                                                                                                    |                |              |
| Concrete with traditional cement clinker substitutes outside current standards (>35%) | 37% [8]<br>45%; 30% fly ash, 30% GGBS [71]<br>48%; 55% GGBS, 5% ground lime [76]<br>61%; 67% GGBS [77]<br>66%; 73% GGBS [78]<br>62%; 80% GGBS [79]                                                                                                                                                       | 2030-          |              |
| Concrete with non-traditional waste-based cement clinker substitutes                  | 11%; 10% EAF steel slag [67]<br>40%; calcium-carbide residue [42]<br>42%; calcium-carbide residue [1]                                                                                                                                                                                                    | 2025/2030-     | [10,74]      |
| Natural cement clinker substitutes                                                    | 20%; Pozzolan [80]<br>20%; Barley/rice husks [81]<br>27%; Calcined clay [82]<br>40%; 30% fly ash, 10% silica [71]<br>47%; 14% silica, 8% fly ash [79]                                                                                                                                                    | 2025/2030-     | [10,74,83]   |
| Advanced concretes                                                                    | 9%; Geopolymer [84]<br>34%; Geopolymer [1]<br>44–64%; Geopolymer [85]<br>45%; Fly-ash based geopolymer [86]<br>52%; Geopolymer [87]<br>54% [88]<br>66%; Geopolymer [42]<br>47%; Alkali-activated 70% volcanic pozzolan 30% GGBS [89]<br>55–75%; Alkali-activated [90]<br>85%; Magnesium-oxide based [42] | 2030/2045      | [8,91,92]    |
| Cement recycling                                                                      | 6% [58]                                                                                                                                                                                                                                                                                                  | 2030/2045      |              |
| Biomass cement plant fuel substitution                                                | 7–30%; Biological sludge [93]<br>6–10%; Agricultural residues [94]<br>10%; 40% meat and bone meal [95]<br>10–12% [8]<br>10–15% [74]<br>20% [4]<br>21–28%; Sewage sludge [96]                                                                                                                             | 2025/<br>2030- | [1]          |
| Wastes as cement plant fuel substitution                                              | 3–5%; 30% meat and bone meal/ municipal solid waste [97]<br>6% [98]<br>1–9% [99]<br>3–9%; 50% tires [100]<br>4–11% [74]<br>12%; 30% refuse-derived [93]<br>20%; Tires [101]                                                                                                                              | 2025/<br>2030- | [1]          |
| Carbon capture and storage to capture cement plant CO <sub>2</sub> emissions          | 45% [4]<br>32–48% [74]<br>48% [8]<br>39–78% [1]<br>60–72%; Oxy-combustion/chemical-looping [101]<br>65–90%; Partial/full oxy-combustion [102]<br>89–99%; Oxy-combustion/chemical-looping [45]<br>76–100%; Oxy-combustion/ chemical-looping [44]                                                          | 2030-          | [46,103–105] |
| Electrification of cement production                                                  | 32% [106]<br>33% [107]<br>54% [108]                                                                                                                                                                                                                                                                      | 2030/ 2045     | [4]          |

<sup>1</sup> Compared with the reference GHG emissions factor for concrete based on Portland cement.

<sup>2</sup> Implementation timelines separated by a backslash denotes different expected timelines for implementation provided in literature. The dash symbolizes progressive implementation for the initial expected year of implementation.

## 2. Steel Production and Use

Construction steel, often galvanized, is predominantly produced by primary steel, i.e., from iron ore in integrated steel plants, while reinforcement steel is mainly produced by scrap steel in secondary steelmaking plants, called electric arc furnaces (EAF) or mini-mills, although this varies globally depending on the availability of scrap steel [109]. EAFs mainly use electricity but are also fueled by natural gas (25–30%) and a smaller share of coal (<5%).

Overall, enhanced material efficiency and circularity measures are key current abatement options to reduce embodied emissions associated with steel [9,15,58,110]. The main opportunities lie in reducing waste during the construction process; reduce the amount of material in each building by avoiding over-specification and using higher-strength materials; and reusing buildings and building components. Studies have demonstrated that between 35–45% of steel in construction is in excess of what is necessary to achieve the desired structural strength [58,111,112]. Further with better sorting and separation, there is potential for an increased scrap share in primary steel production [58,113].

In the short- to mid-term, bio-based fuels and reducing agents (charcoal or biocoke) is another feasible option to mitigate GHG emissions [114] in modern integrated steel plants. Further CO<sub>2</sub> emissions reductions are difficult without drastic changes in technology.

Technologies with potential for deep emission cuts include top-gas recycling blast furnaces with carbon capture, different smelting technologies, electrowinning, and hydrogen direct reduction [105]. For all of these, wider adoption is unlikely before 2030 [115]. Partial CO<sub>2</sub> capture however is a mature and low-cost technology that can be implemented in the coming 10–15 years without major changes to the existing process and which can be combined with biomass substitution.

For secondary steel production in electric arc furnace (EAFs), electricity is the main energy carrier, making the emission intensity of the electricity used an important factor. Biomass could substitute fossil process energy also here, both as a reducing agent and as fuel in reheating furnaces [116].

Fuel substitution from natural gas to bio-based syngas or biooil is similarly proposed in metallurgical processes [117]. Details of the emission reduction measures for construction and reinforcement steel are found in Table S2, while further details and analysis of emissions, energy, and cost implications for the Swedish steel industry, which are deemed applicable for developments also on a European level, can be found in a recent technical report by Toktarova et al. [118].

**Table S2.** Overview of emission reduction measures for construction and reinforcement steel described in literature together with the described time aspect of implementation (if available). (Emissions reductions measures in *italic* have not been included in the pathway analysis.)

| Emission Reduction Measures                                      | Reduction Potential Identified <sup>1</sup>                                                                          | Time Aspect of Implementation <sup>2</sup> | Additional References |
|------------------------------------------------------------------|----------------------------------------------------------------------------------------------------------------------|--------------------------------------------|-----------------------|
| Structural optimization—<br>Reduced overspecification            | 15% [9]<br>15–30% [111]<br>20–50% [15,58]                                                                            | Now-                                       |                       |
| Reinforcement steel produced by<br>secondary (scrap-based) steel | 37–56% [109,119,120]                                                                                                 | Now-                                       |                       |
| Reinforcement steel produced<br>with low emission electricity    | 5–27% [6]<br>65% [121]                                                                                               | Now-                                       | [6,121]               |
| Increased scrap-ratio                                            | 10–20% [58,113]                                                                                                      | Now/<br>2025-                              |                       |
| Biomass fuel substitution in<br>integrated steel plants          | 10% [122]<br>7–15% [123]<br>17–23% [124]<br>30% [125]<br>20–41% [126]<br>31–57% 25–37% BF only [127]<br>88–91% [117] | 2025/<br>2030-                             | [114,128]             |

| Emission Reduction Measures                                                           | Reduction Potential Identified <sup>1</sup>                                                                                                                               | Time Aspect of Implemen-<br>tation <sup>2</sup> | Additional References |
|---------------------------------------------------------------------------------------|---------------------------------------------------------------------------------------------------------------------------------------------------------------------------|-------------------------------------------------|-----------------------|
| Carbon capture and storage (e.g., combined with blast furnace top-gas recycling, TGR) | 23%/60%; TGR w/wo CCS [129]<br>50%; TGR w CCS [115]<br>56–62%; TGR w CCS [130]<br>60%; TGR w CCS [131]<br>20–80%; HISarna wo/w CCS [115]<br>5–55%; ULCORED wo/w CCS [115] | 2030-                                           | [92,125]              |
| Hydrogen reduction                                                                    | 70%; Hydrogen [106]<br>53–91%; H-DR: current EU electricity emission factor - zero emission el [130]                                                                      | 2045                                            | [92,108,125,132,133]  |
| Biogas/ biocoke in secondary steel production heating ovens                           | 7–21%; Biobased syngas [134]<br>6–11%; 50–100% biocoke [127]<br>28%; Biogas and biocoke [116]                                                                             | 2025/<br>2030-                                  | [124,125]             |
| Biomass in steel metallurgy                                                           | 10% [135]                                                                                                                                                                 | 2025/<br>2030-                                  | [117,125,134]         |

<sup>1</sup> Compared with the reference GHG emissions factor for galvanized steel (construction steel produced from iron ore in an integrated steel plant) and reinforcement steel (produced from 50% primary and 50% scrap steel), respectively.

<sup>2</sup> Implementation timelines separated by a backslash denotes different expected timelines for implementation provided in literature. The dash symbolizes progressive implementation for the initial expected year of implementation.

### 3. Asphalt Production and Paving

New asphalt technologies and mixes can reduce the temperatures required to produce and place the material, lessening fuel consumption and GHG emissions [136]. Another key advantage of warm mix asphalt (WMA) compared to conventional hot mix asphalt is the potentially greater use of recycled (or reclaimed) asphalt pavement (RAP), reducing the need for virgin bitumen binders [137]. Even lower temperature asphalt emulsions are currently used on low traffic roads, while mixes able to withstand heavier traffic are under development [136,138].

Fuel substitution in the asphalt plants to biofuels is another option being implemented widely in Sweden [139]. Other potential options include the use of secondary materials to replace natural aggregates [140] and introduction of bio-based binders [141]. Details of the emission reduction measures identified for asphalt are found in Table S3.

**Table S3.** Overview of emission reduction measures for bitumen-bound layers described in literature together with the described time aspect of implementation (if available). (Emissions reductions measures in *italic* have not been included in the pathway analysis.)

| Emission reduction measures                     | Reduction potential identified <sup>1</sup>                                                                                                                                                        | Time aspect of implementation <sup>2</sup> | Additional references |
|-------------------------------------------------|----------------------------------------------------------------------------------------------------------------------------------------------------------------------------------------------------|--------------------------------------------|-----------------------|
| Bio-based fuel in asphalt production            | 33% [142]<br>35% [139]<br>47% [143]                                                                                                                                                                | Now-                                       | [144]                 |
| <i>Biobased bitumen</i>                         | 16–23% [139]<br>30% [141]                                                                                                                                                                          | 2030-                                      |                       |
| Low-tempered warm asphalt (WMA)                 | 5–12% [137]<br>10%; incl. 40% RAP [137]<br>12%; WMA in base layer with 30% RAP [145]<br>15–16% [146]<br>19% [136]                                                                                  | Now-                                       |                       |
| <i>Cold asphalt emulsion mix</i>                | 52% [138]<br>40–60% [137]<br>68%; incl. 40% RAP [136]                                                                                                                                              | 2025-                                      |                       |
| Asphalt recycling and reuse                     | 10%; WMA with 40% RAP [137]<br>12%; 20% RAP [136]<br>13–24%; 25% RAP [147]<br>13–14%; HMA and WMA with 15% RAP [146]<br>5–20%; 50% RAP [148]<br>16–25%; 30%–50% RAP [149]<br>23–36%; 77% RAP [150] | Now-                                       | [151,152]             |
| <i>Reduce aggregate moisture content</i>        | 1–5% [148]<br>4–14% [137]<br>9% [144]                                                                                                                                                              | Now-                                       |                       |
| <i>Use of other waste products in pavements</i> | 5%; Fly ash [153]<br>6%; Blast furnace slag [154]                                                                                                                                                  | 2025-                                      | [140,155]             |
| Bio-fueled/electric aggregate production        | 2–3% [144]<br>3% [142]<br>6–7% [143]                                                                                                                                                               | 2030-                                      | [156]                 |

<sup>1</sup> Compared with total reference GHG emissions for bitumen bound layers.

<sup>2</sup> Implementation timelines separated by a backslash denotes different expected timelines for implementation provided in literature. The dash symbolizes progressive implementation for the initial expected year of implementation.

#### 4. Insulation

At present, polystyrene and mineral wool are the most frequently used for insulating buildings [157]. In comparison with polystyrene, mineral wools have a lower carbon footprint and primary energy demand [27,158]. Nevertheless, mineral wool production requires high temperature furnaces often fueled by oil or natural gas [159], and rock wool production, a certain consumption of coal to fuse the basaltic rock [158]. Fuel change together with energy efficiency measures are key abatement measures for production of both mineral wool and polystyrene insulation [15,159,160]. Regarding polystyrene, abatement options that are pertinent to plastic production are also of relevance. The introduction of recycled materials into the product composition is another option to improve the environmental performance of mineral wool insulation, particularly relevant for glass wool production [161,162].

Other abatement options the use of natural resins, such as wood fiber and cellulose, as insulation material [163,164]. However, while having lower embodied emissions lower than those of mineral wool, the natural insulation materials available in the market at current have higher thermal conductivity than that of mineral

wool and this leads to a thicker insulation layer [165]. Details of the emission reduction measures identified for insulation are found in Table S4.

**Table S4.** Overview of emission reduction measures for use of insulation materials in buildings described in literature together with time aspect of implementation (if available). (Emissions reductions measures in *italic* have not been included in the pathway analysis.)

| Emission Reduction Measures                                                                                                | Reduction Potential Identified <sup>1</sup> | Time Aspect of Implementation <sup>2</sup> | Additional References |
|----------------------------------------------------------------------------------------------------------------------------|---------------------------------------------|--------------------------------------------|-----------------------|
| Material substitution - Alternative conventional insulation materials (glass/rockwool)                                     | 32–75% [158,166,167]                        | Now-                                       | [161,168]             |
| <i>Material substitution - Alternative non-conventional insulation materials (cellulose, wood chips, cork, hemp, flax)</i> | 63–94% [158,159,166,167,169]                | 2025-                                      | [161,163,165]         |
| Glass wool produced from recycled glass                                                                                    | 30% [160,166]<br>37% [7]                    | Now-                                       |                       |
| Energy efficiency and fuel change (including electrification) for mineral wool production                                  | 12% [160,170]                               | 2025-                                      |                       |
| Energy efficiency and fuel change for plastic and EPS/XPS production                                                       | 21–44% [15,161]                             | 2025-                                      |                       |

<sup>1</sup> For material substitution compared with reference GHG emissions data for polystyrene-based insulation. For specific material production measures compared with the reference production for the specific insulation material.

<sup>2</sup> Implementation timelines separated by a backslash denotes different expected timelines for implementation provided in literature. The dash symbolizes progressive implementation for the initial expected year of implementation.

## 5. Gypsum and Plaster

The most prominent abatement measure for the production of gypsum for plasterboards is the use of recycled gypsum, with studies confirming it is possible to substitute 100% of commercial gypsum with gypsum waste from industrial plasterboard production without any heating treatment [171]. A positive side-effect of gypsum recycling is also a lowered energy consumption for the fabrication of recycled gypsum [172]. Recycling can be combined with electrification of biofuel substation in the heating furnaces used in the production of gypsum [172].

Other abatement options include substituting part of the gypsum in the plasterboards with for example cardboard [173] or use building boards made of natural fibers, such as hemp, flax, or jute [174]. Details of the emission reduction measures identified for gypsum and plaster are found in Table S5.



**Table S5.** Overview of emission reduction measures for gypsum and plaster described in literature together with time aspect of implementation (if available). (Emissions reductions measures in *italic* have not been included in the pathway analysis.)

| Emission Reduction Measures           | Reduction Potential Identified <sup>1</sup> | Time Aspect of Implementation <sup>2</sup> | Additional References |
|---------------------------------------|---------------------------------------------|--------------------------------------------|-----------------------|
| Electrification/ biofuel substitution | 25–85% [172]                                | 2025/2030-                                 | [170]                 |
| Recycled feedstock                    | 58–65% [171,172]                            | Now/2025-                                  | [175]                 |
| Biobased feedstock                    | 47–59% [174]                                |                                            |                       |

<sup>1</sup> Compared with total GHG emissions for gypsum plasterboard.

<sup>2</sup> Implementation timelines separated by a backslash denotes different expected timelines for implementation provided in literature. The dash symbolizes progressive implementation for the initial expected year of implementation.

## 6. Plastics

Plastics are made from fossil oil and gas, produced predominantly through steam cracking of naphtha and ethane, which obtained by refining crude oil and from natural gas, respectively. Indeed, the steam cracking is responsible for a large share of its carbon footprint (~40%) combined with feedstock production, refining, polymerization and blending [15]. Improved efficiencies in the refining, cracking and polymerization steps could be achieved via enhanced catalytic processes or advanced membrane separation [170,176]. Deep abatement options for plastics production otherwise include electrification of cracking and polymerization [108]. Another is to fit carbon capture and storage or use (CCS/U) to current processes. To reach deep abatement level, however, carbon capture would need to be applied not just to fit the core steam cracking process, but also to refining to capture CO<sub>2</sub> upstream (and to end-of-life incineration plants to capture CO<sub>2</sub> downstream) [15].

However, plastic can be also recycled, rather than incinerated, either by mechanical or chemical means [9,58,177]. A more current abatement option is reduced use of plastics in key value chains. Through greater materials efficiency in end products, plastics demand in the buildings value chains could be reduced by up to 35% [9,58]. There are also developments around alternative biobased or synthetic feedstocks [177]. Details of the emission reduction measures identified for plastics are found in Table S6.

**Table S6.** Overview of emission reduction measures for gypsum and plaster described in literature together with time aspect of implementation (if available). (Emissions reductions measures in *italic* have not been included in the pathway analysis.)

| Emission Reduction Measures                                  | Reduction Potential Identified <sup>1</sup> | Time Aspect of Implementation <sup>2</sup> | Additional References |
|--------------------------------------------------------------|---------------------------------------------|--------------------------------------------|-----------------------|
| Material efficiency                                          | 14–35% [15,58,177]                          | Now-                                       |                       |
| Energy efficiency and fuel change                            | 15–40% [15,178]                             | Now/2025-                                  |                       |
| Novel catalysts and membranes                                | 5–15% [170]                                 | 2025-                                      | [177]                 |
| Electrification/CCS on refining, cracking and polymerization | 60–65% [15,177]                             | 2030-                                      | [108]                 |
| Plastics recycling                                           | 56% [58]<br>91–100% [15]                    | 2030-                                      | [110]                 |
| Biobased/synthetic feedstock                                 | 40% [15,177]                                |                                            |                       |

<sup>1</sup> Compared with average GHG emissions for polyethylene (PE) and polyvinylchloride (PVC).

<sup>2</sup> Implementation timelines separated by a backslash denotes different expected timelines for implementation provided in literature. The dash symbolizes progressive implementation for the initial expected year of implementation.

## 7. Construction Process

The main abatement technical measures for the various construction machinery used in road construction are fuel substitution, hybridization and eventually electrification [179–181]. Hybrid excavators are already available on the market along with a few examples of hybrid wheel loaders and this development is expected to continue, going towards electrification where possible [182].

Non-technical abatement measures include optimization of mass handling requirements and optimization of utilization of vehicles, speeds and routes, and choice of vehicles for the intended use [180].

The main abatement measures relating to crushing plants are also fuel substitution and electrification together with in-pit crushing and conveying [183]. Details of the emission reduction measures identified for construction equipment and the construction process are found in Table S7.

**Table S7.** Overview of emission reduction measures for construction equipment, including crushing plants described in literature together with time aspect of implementation (if available).

| Emission Reduction Measures                        | Reduction Potential Identified <sup>1</sup>                                                                                                                                                                                  | Time Aspect of Implem-entation <sup>2</sup> | Additional References |
|----------------------------------------------------|------------------------------------------------------------------------------------------------------------------------------------------------------------------------------------------------------------------------------|---------------------------------------------|-----------------------|
| Shifts to biofuels in construction equipment       | 86%; HVO 2017 well-to-tank vs Diesel MK1 [184]<br>36–90%; HVO well-to-tank from various sources vs fossil diesel [185]<br>66–90%; HVO well-to-tank from various sources vs fossil diesel [184]<br>1–+3%; Tank-to-wheel [186] | Now-                                        | [180,181,186, 187]    |
| Hybridization of construction equipment            | 15–25%; General [180]<br>13–26%; Excavators [188]<br>15%; Excavators [189]<br>25–40%; Excavators [180]<br>21–41%; Excavators [190]<br>10–35%; Wheel loaders [180]<br>20–50%; Wheel loader [191]<br>30%; Wheel loader [192]   | Now/<br>2025-                               | [181]                 |
| Fuel-celled/ plug-in hybrid construction equipment | 50% [192]<br>56–59% [193]<br>60%; Supercapacitor and batteries [190]                                                                                                                                                         | 2030-                                       | [180,181,191]         |
| Electrified construction equipment                 | 67%; Energy efficiency [194]<br>95% [182]<br>95% [195]                                                                                                                                                                       | 2030/ 2045                                  | [181,196]             |
| Optimization of mass handling/ equipment use       | 4–13% [191]<br>10% [180]<br>12% [197]<br>17% [198]<br>21% [183]                                                                                                                                                              | Now-                                        | [199]                 |
| Bio-fueled/ electric rock crushing plants          | 17%; Bio-fueled [198]<br>94–97%; Electric [200]<br>91–97%; Electric [183]<br>91%; Electric [201]<br>95%; Electric [202]                                                                                                      | Now/<br>2025-                               | [195]                 |
| Work shed/office efficiency                        | 7–9% [40]<br>7–10% [178]                                                                                                                                                                                                     | Now-                                        | [203]                 |

<sup>1</sup> Compared with total GHG emissions based on the reference energy use of the specific construction equipment/construction process activity.

<sup>2</sup> Implementation timelines separated by a backslash denotes different expected timelines for implementation provided in literature. The dash symbolizes progressive implementation for the initial expected year of implementation.

## 8. Heavy Transports

Like construction equipment, heavy-duty trucks are predominantly driven by internal combustion engines fueled by diesel. Fuel substitution is thus a key emission reduction measure, with other opportunities being vehicle efficiency technologies including hybridization with double power trains, waste heat recovery, and regenerative braking expected to offer the largest emission reduction potential [204,205].

Complete electrification with battery electric trucks for long-haul trucking could be possible in the mid-to long-term but to allow their wide-spread usage the road-freight sector would have to transform well beyond the vehicle, including large-scale infrastructure investments, such as a vast, comprehensive rollout of fast-charging infrastructure and/or electric road infrastructure [206]. Finally, improving the logistics of trucking movements also bear significant potential [207]. Details of the emission reduction measures identified for heavy transports are found in Table S8.

**Table S8.** Overview of emission reduction measures for heavy transport (trucks and on-road haulers) described in literature together with time aspect of implementation (if available).

| Emission reduction measures                                                                      | Reduction potential identified <sup>1</sup>                                                                                                                                                                                                                | Time aspect of implementation <sup>2</sup> | Additional references |
|--------------------------------------------------------------------------------------------------|------------------------------------------------------------------------------------------------------------------------------------------------------------------------------------------------------------------------------------------------------------|--------------------------------------------|-----------------------|
| Shifts to biofuels in heavy transports                                                           | 86%; HVO100 2017 well-to-tank compared to Diesel MK1 [184]<br>36–90%; HVO well-to-tank from various sources compared to fossil diesel [185]<br>66–90%; HVO well-to-tank from various sources compared to fossil diesel [184]<br>1–+3%; Tank-to-wheel [186] | Now-                                       | [206–208]             |
| Hybridization of heavy transports (double power trains)                                          | 6–19% [209]<br>16% [210]<br>11–22% [211]<br>31% [212]<br>33% [213]                                                                                                                                                                                         | 2030-                                      | [205,206,214]         |
| Fuel-celled/ plug-in hybrid heavy trucks (potentially in combination with electric road systems) | 27–39% [215]<br>40–50% [208]<br>50% [206]<br>70% [213]                                                                                                                                                                                                     | 2030/ 2045                                 | [58,207,216]          |
| Optimization of logistics and road freight operations                                            | 20% [206]<br>10–33% [207]                                                                                                                                                                                                                                  | Now-                                       |                       |

<sup>1</sup> Compared with total GHG emissions based on the reference energy use of a 32-ton Euro 6 truck.

<sup>2</sup> Implementation timelines separated by a backslash denotes different expected timelines for implementation provided in literature. The dash symbolizes progressive implementation for the initial expected year of implementation.

## References

- Kajaste, R.; Hurme, M. Cement industry greenhouse gas emissions – management options and abatement cost. *J. Clean. Prod.* **2016**, *112*, 4041–4052, doi:10.1016/J.JCLEPRO.2015.07.055.
- Kungliga Ingenjörsvetenskaps Akademien *Så klarar svensk industri klimatmålen - En delrapport från IVA-projektet Vägval för klimatet.*; 2019;
- Favier, A.; De Wolf, C.; Scrivener, K.; Habert, G. A sustainable future for the European cement and concrete industry: Technology assessment for full decarbonisation of the industry by 2050. **2018**, *96*, doi:10.3929/ethz-b-000301843.
- Cementa; Fossilfritt Sverige *Färdplan cement för ett klimatneutralt betongbyggande*; 2018;
- Cembureau *Cements for a low-carbon Europe*; 2013;
- Lindgren, Å.; Simonsson, P.; Olofsson, J.; Uppenberg, S.; Ekström, D.; Liljenroth, U.; Magnusson, J.; Söderqvist, J.; Wilhelmsson, B.; Lindvall, A.; et al. *Klimatoptimerat byggande av betongbroar - Råd och vägledning*; 2017;

7. Lehne, J.; Preston, F. *Chatham House Report: Making Concrete Change Innovation in Low-carbon Cement and Concrete*; 2018;
8. IEA; CSI Technology Roadmap: Low-Carbon Transition in the Cement Industry. **2018**, 66, doi:10.1007/SpringerReference\_7300.
9. Allwood, J.M.; Dunant, C.F.; Lupton, R.C.; Cleaver, C.J.; Serrenho, A.C.H.; Azevedo, J.M.C.; Horton, P.M.; Clare, C.; Low, H.; Horrocks, I.; et al. Absolute Zero. Delivering the UK's climate change commitment with incremental changes to today's technologies. **2019**, doi:10.17863/CAM.46075.
10. Mikulčić, H.; Vujanović, M.; Urbaniec, K.; Duić, N. Reducing greenhouse gasses emissions by fostering the deployment of alternative raw materials and energy sources in the cleaner cement manufacturing process. *J. Clean. Prod.* **2016**, 136, 119–132, doi:10.1016/J.JCLEPRO.2016.04.145.
11. Naturvårdsverket; Boverket *Klimatscenarier för bygg - och fastighetssektorn - Förslag på metod för bättre beslutsunderlag*; 2019;
12. ERMCO Ready-mixed concrete industry statistics. Year 2013. **2014**, 21.
13. ERMCO European Ready Mix Concrete Organization (ERMCO) Statistics 2016. **2017**.
14. Adnerfall, J. (Golvbranschen G. *Bygg & Teknik*. August 2018,.
15. Material Economics *Industrial Transformation 2050 - Pathways to Net-Zero Emissions from EU Heavy Industry*; 2019;
16. Winchester, N.; Reilly, J.M. The economic and emissions benefits of engineered wood products in a low-carbon future. *Energy Econ.* **2020**, 85, doi:10.1016/j.eneco.2019.104596.
17. Skullestad, J.L.; Bohne, R.A.; Lohne, J. High-rise Timber Buildings as a Climate Change Mitigation Measure - A Comparative LCA of Structural System Alternatives. *Energy Procedia* **2016**, 96, 112–123, doi:10.1016/j.egypro.2016.09.112.
18. Ramage, M.H.; Burridge, H.; Busse-Wicher, M.; Fereday, G.; Reynolds, T.; Shah, D.U.; Wu, G.; Yu, L.; Fleming, P.; Densley-Tingley, D.; et al. The wood from the trees: The use of timber in construction. *Renew. Sustain. Energy Rev.* **2017**, 68, 333–359, doi:10.1016/j.rser.2016.09.107.
19. Hildebrandt, J.; Hagemann, N.; Thrän, D. The contribution of wood-based construction materials for leveraging a low carbon building sector in europe. *Sustain. Cities Soc.* **2017**, 34, doi:10.1016/j.scs.2017.06.013.
20. Brege, S.; Nord, T.; Stehn, L. Industriellt byggande i trä – nuläge och prognos mot 2025. **2017**, 1–20, doi:DNR LIU-IEI-RR-17/00263-SE.
21. Freeman, B.; Harry, S.J.; Kmietowicz, E. Biomass in a low - carbon economy. **2018**.
22. SCB Priserna för nyproducerade bostadshus lägre än föregående år Available online: <https://www.scb.se/hitta-statistik/statistik-efter-amne/boende-byggande-och-bebyggelse/byggnadskostnader/priser-for-nyproducerade-bostader/pong/statistiknyhet/priser-for-nyproducerade-bostader-2018/> (accessed on Mar 9, 2020).
23. Peñaloza, D.; Erlandsson, M.; Berlin, J.; Wålinder, M.; Falk, A. Future scenarios for climate mitigation of new construction in Sweden: Effects of different technological pathways. *J. Clean. Prod.* **2018**, 187, 1025–1035, doi:10.1016/j.jclepro.2018.03.285.
24. Tillväxtanalys Vad är statens roll i omställningen till klimatneutrala konstruktionsmaterial? **2018**.
25. Hafner, A.; Schäfer, S. Comparative LCA study of different timber and mineral buildings and calculation method for substitution factors on building level. *J. Clean. Prod.* **2018**, 167, 630–642, doi:10.1016/j.jclepro.2017.08.203.
26. Moncaster, A.M.; Birgisdottir, H.; Malmqvist, T.; Nygaard Rasmussen, F.; Houlihan Wiberg, A.; Soulti, E. Embodied carbon measurement, mitigation and management within Europe, drawing on a cross-case analysis of 60 building case studies. *Embodied Carbon Build. Meas. Manag. Mitig.* **2018**, 443–462, doi:10.1007/978-3-319-72796-7\_20.
27. Birgisdottir, H.; Moncaster, A.; Wiberg, A.H.; Chae, C.; Yokoyama, K.; Balouktsi, M.; Seo, S.; Oka, T.; Lützkendorf, T.; Malmqvist, T. IEA EBC annex 57 'evaluation of embodied energy and CO<sub>2</sub>eq for building construction.' *Energy Build.* **2017**, 154, doi:10.1016/j.enbuild.2017.08.030.
28. Chastas, P.; Theodosiou, T.; Kontoleon, K.J.; Bikas, D. Normalising and assessing carbon emissions in the building sector: A review on the embodied CO<sub>2</sub> emissions of residential buildings. *Build. Environ.* **2018**, 130, 212–226.
29. Bahramian, M.; Yetilmezsoy, K. Life cycle assessment of the building industry: An overview of two decades of research (1995–2018). *Energy Build.* **2020**, 219, doi:10.1016/j.enbuild.2020.109917.

30. Hafner, A.; Schäfer, S. Environmental aspects of material efficiency versus carbon storage in timber buildings. *Eur. J. Wood Wood Prod.* **2018**, *76*, 1045–1059, doi:10.1007/s00107-017-1273-9.
31. Berndes, G.; Goldmann, Mattias, Johnsson, F.; Lindroth, A.; Wijkman, A.; Abt, B.; Bergh, J.; Cowie, A.; Kalliokoski, T.; Kurz, W.; Luyssaert, Sebastiaan Nabuurs, G.-J. 2018,.
32. Breton, C.; Blanchet, P.; Amor, B.; Beauregard, R.; Chang, W.S. Assessing the climate change impacts of biogenic carbon in buildings: A critical review of two main dynamic approaches. *Sustain.* **2018**, *10*.
33. Tellnes, L.G.F.; Garne-Chedeville, C.; Dias, A.; Dolezal, F.; Hill, C.; Escamilla, E.Z. Comparative assessment for biogenic carbon accounting methods in carbon footprint of products: A review study for construction materials based on forest products. *IForest* **2017**, *10*, 815–823, doi:10.3832/ifer2386-010.
34. Geng, A.; Yang, H.; Chen, J.; Hong, Y. Review of carbon storage function of harvested wood products and the potential of wood substitution in greenhouse gas mitigation. *For. Policy Econ.* **2017**, *85*, 192–200, doi:10.1016/j.forpol.2017.08.007.
35. Peñaloza, D.; Røyne, F.; Sandin, G.; Svanström, M.; Erlandsson, M. The influence of system boundaries and baseline in climate impact assessment of forest products. *Int. J. Life Cycle Assess.* **2019**, *24*, 160–176, doi:10.1007/s11367-018-1495-z.
36. De Rosa, M.; Pizzol, M.; Schmidt, J. How methodological choices affect LCA climate impact results: the case of structural timber. *Int. J. Life Cycle Assess.* **2018**, *23*, 147–158, doi:10.1007/s11367-017-1312-0.
37. Gustavsson, L.; Joelsson, A.; Sathre, R. Life cycle primary energy use and carbon emission of an eight-storey wood-framed apartment building. *Energy Build.* **2010**, *42*, 230–242, doi:10.1016/j.enbuild.2009.08.018.
38. John, S.; Nebel, B.; Perez, N.; Buchanan, A. Environmental Impacts of Multi-Storey Buildings Using Different Construction Materials. *Res. Rep. 2008-02* **2008**, 204.
39. Tetley, U.Y.A.; Dadoo, A.; Gustavsson, L. Effect of different frame materials on the primary energy use of a multi storey residential building in a life cycle perspective. *Energy Build.* **2019**, *185*, 259–271, doi:10.1016/j.enbuild.2018.12.017.
40. Erlandsson, M.; Malmqvist, T.; Francart, N.; Kellner, J. *Minskad klimatpåverkan från nybyggda flerbostadshus - Underlagsrapport*; 2018;
41. Wilhelmsson, B.; Kolberg, C.; Larsson, J.; Eriksson, J.; Eriksson, M. *CemZero - Feasibility study*; 2018;
42. Hasanbeigi, A.; Price, L.; Lin, E. Emerging energy-efficiency and CO<sub>2</sub> emission-reduction technologies for cement and concrete production: A technical review. *Renew. Sustain. Energy Rev.* **2012**, *16*, 6220–6238, doi:10.1016/j.RSER.2012.07.019.
43. Kuramochi, T.; Ramírez, A.; Turkenburg, W.; Faaij, A. Comparative assessment of CO<sub>2</sub> capture technologies for carbon-intensive industrial processes. *Prog. Energy Combust. Sci.* **2012**, *38*, 87–112, doi:10.1016/j.pecs.2011.05.001.
44. Rolfe, A.; Huang, Y.; Haaf, M.; Pita, A.; Rezvani, S.; Dave, A.; Hewitt, N.J. Technical and environmental study of calcium carbonate looping versus oxy-fuel options for low CO<sub>2</sub> emission cement plants. *Int. J. Greenh. Gas Control* **2018**, *75*, 85–97, doi:10.1016/j.ijggc.2018.05.020.
45. Rodríguez, N.; Murillo, R.; Abanades, J.C. CO<sub>2</sub> capture from cement plants using oxyfired precalcination and/ or calcium looping. *Environ. Sci. Technol.* **2012**, *46*, 2460–2466, doi:10.1021/es2030593.
46. Vatopoulos, K.; Tzimas, E. Assessment of CO<sub>2</sub> capture technologies in cement manufacturing process. *J. Clean. Prod.* **2012**, *32*, 251–261, doi:10.1016/j.jclepro.2012.03.013.
47. Leeson, D.; Dowell, N. Mac; Shah, N.; Petit, C.; Fennell, P.S. A Techno-economic analysis and systematic review of carbon capture and storage (CCS) applied to the iron and steel, cement, oil refining and pulp and paper industries, as well as other high purity sources. *Int. J. Greenh. Gas Control* **2017**, *61*, 71–84, doi:10.1016/j.ijggc.2017.03.020.
48. Cormos, C.C.; Cormos, A.M.; Petrescu, L. *Assessing the CO<sub>2</sub> Emissions Reduction from Cement Industry by Carbon Capture Technologies: Conceptual Design, Process Integration and Techno-economic and Environmental Analysis*; Elsevier Masson SAS, 2017; Vol. 40; ISBN 9780444639653.
49. Jakobsen, J.; Roussanaly, S.; Anantharaman, R. A techno-economic case study of CO<sub>2</sub> capture, transport and storage chain from a cement plant in Norway. *J. Clean. Prod.* **2017**, *144*, 523–539, doi:10.1016/j.jclepro.2016.12.120.
50. Energimyndigheten Industrins processrelaterade utsläpp av växthusgaser och hur de kan minskas ER 2018:24. **2018**.
51. Karlsson, I.; Toktarova, A.; Rootzén, J.; Odenberger, M. *Technical Roadmap - Cement Industry*; 2020;

52. Heeren, N.; Mutel, C.L.; Steubing, B.; Ostermeyer, Y.; Wallbaum, H.; Hellweg, S. Environmental Impact of Buildings - What Matters? *Environ. Sci. Technol.* **2015**, *49*, 9832–9841, doi:10.1021/acs.est.5b01735.
53. Dodoo, A.; Gustavsson, L.; Sathre, R. Climate impacts of wood vs. non-wood buildings. **2016**, 1–55.
54. Hammervold, J.; Reenaas, M.; Bratlebø, H. Environmental life cycle assessment of bridges. *J. Bridg. Eng.* **2013**, *18*, 153–161, doi:10.1061/(ASCE)BE.1943-5592.0000328.
55. O’Born, R. Life cycle assessment of large scale timber bridges: A case study from the world’s longest timber bridge design in Norway. *Transp. Res. Part D Transp. Environ.* **2018**, *59*, 301–312, doi:10.1016/j.TRD.2018.01.018.
56. Du, G.; Pettersson, L.; Karoumi, R. Soil-steel composite bridge: An alternative design solution for short spans considering LCA. *J. Clean. Prod.* **2018**, doi:10.1016/j.jclepro.2018.04.097.
57. Petzek, E.; Băncilă, R. Economical bridge solutions based on innovative composite dowels and integrated abutments: Ecobridge. *Econ. Bridg. Solut. Based Innov. Compos. Dowels Integr. Abutments Ecobridge* **2015**, 1–179, doi:10.1007/978-3-658-06417-4.
58. Energy Transition Commission *Mission Possible - Reaching Net Zero Carbon Emissions from Harder-to-abate sectors by Mid-century*; 2018;
59. Shanks, W.; Dunant, C.F.; Drewniok, M.P.; Lupton, R.C.; Serrenho, A.; Allwood, J.M. How much cement can we do without? Lessons from cement material flows in the UK. *Resour. Conserv. Recycl.* **2019**, *141*, 441–454, doi:10.1016/j.resconrec.2018.11.002.
60. Itoh, Y.; Kitagawa, T. Using CO<sub>2</sub> emission quantities in bridge lifecycle analysis. *Eng. Struct.* **2003**, *25*, 565–577, doi:10.1016/S0141-0296(02)00167-0.
61. Penadés-Plà, V.; Martí, J. V.; García-Segura, T.; Yepes, V. Life-cycle assessment: A comparison between two optimal post-tensioned concrete box-girder road bridges. *Sustain.* **2017**, *9*, doi:10.3390/su9101864.
62. Svensk Betong *Betong och klimat*; 2017;
63. Du, G. (KTH) Life cycle assessment of bridges, model development and case studies, KTH Royal Institute of Technology, 2015.
64. Rydén, M. Impact of different concrete types on the LCA of NCC Composite bridge, Royal Institute of Technology, 2015.
65. Andersson, M.; Barkander, J.; Kono, J.; Ostermeyer, Y. Abatement cost of embodied emissions of a residential building in Sweden. *Energy Build.* **2018**, doi:10.1016/j.enbuild.2017.10.023.
66. Teng, Y.; Li, K.; Pan, W.; Ng, T. Reducing building life cycle carbon emissions through prefabrication: Evidence from and gaps in empirical studies. *Build. Environ.* **2018**, *132*, 125–136, doi:10.1016/j.buildenv.2018.01.026.
67. Worrell, E.; Price, L.; Galitsky, C. *Energy Efficiency Improvement Opportunities for the Cement Industry*; 2008;
68. Nazari, A.; Sanjayan, J.G.; Flower, D.J.M.; Sanjayan, J.G. Greenhouse Gas Emissions Due to Concrete Manufacture. *Handb. Low Carbon Concr.* **2017**, 1–16, doi:10.1016/B978-0-12-804524-4.00001-4.
69. Cementa *Environmental Product Declaration Portland Fly Ash Cement CEM II/A-V 52.5 N (Bascement)*; 2014;
70. Norcem *ENVIRONMENTAL PRODUCT DECLARATION CEM I, Anleggsement (CEM I 52, 5N), Industrisement (52, 5R) og Standardsement (CEM I 42, 5R)*; 2015;
71. Limbachiya, M.; Bostanci, S.C.; Kew, H. Suitability of BS EN 197-1 CEM II and CEM V cement for production of low carbon concrete. *Comput. Chem. Eng.* **2014**, *71*, 397–405, doi:10.1016/j.conbuildmat.2014.08.061.
72. Cemex Scandinavia *Environmental Product Declaration Cemex, Miljøsement, Cem II/B-S 52,5 N*; 2018;
73. Norcem *Environmental Product Declaration Lavkarbonsement*; 2013;
74. Neuhooff, K.; Acworth, W.; Ancygier, A.; Branger, F.; Christmas, I.; Haussner, M.; Ismer, R.; van Rooij, A.; Sartor, O.; Sato, M.; et al. *Carbon Control and Competitiveness Post 2020: The Cement Report*; 2014;
75. Black, L. Low clinker cement as a sustainable construction material. *Sustain. Constr. Mater.* **2016**, 415–457, doi:10.1016/B978-0-08-100370-1.00017-2.
76. Cemex Scandinavia *Environmental Product Declaration Cem III/A 42,5 L-LH/NA*; 2016;
77. Cemex Scandinavia *Environmental Product Declaration Lavvarmesement, Cemex, CEM III/B 42,5 L-LH/SR (na)*; 2018;
78. Cemex Scandinavia *Environmental Product Declaration Lavvarmesement (Cem III/B 42,5 N-SR/LH//NA)*; 2015;
79. Şanal, I. Discussion on the effectiveness of cement replacement for carbon dioxide emission reduction in concrete. *Greenh. Gases Sci. Technol.* **2017**, *13*, 1–13, doi:10.1002/ghg.1748.

80. Manaf, A.; Indrawati, V. Portland-blended cement with reduced co2 using trass pozzolan. *J. Korean Chem. Soc.* **2011**, *55*, 490–494, doi:10.5012/jkcs.2011.55.3.490.
81. Khalil, N.M.; Hassan, E.M.; Shakdofa, M.M.E.; Farahat, M. Beneficiation of the huge waste quantities of barley and rice husks as well as coal fly ashes as additives for Portland cement. *J. Ind. Eng. Chem.* **2014**, *20*, 2998–3008, doi:10.1016/j.jiec.2013.11.034.
82. Zhou, D.; Wang, R.; Tyrer, M.; Wong, H.; Cheeseman, C. Sustainable infrastructure development through use of calcined excavated waste clay as a supplementary cementitious material. *J. Clean. Prod.* **2017**, *168*, 1180–1192, doi:10.1016/j.jclepro.2017.09.098.
83. Wray, P. Straight talk with Karen Scrivener on cements, CO2 and sustainable development. *Am. Ceram. Soc. Bull.* **2012**, *91*, 47–50.
84. Turner, L.K.; Collins, F.G. Carbon dioxide equivalent (CO<sub>2</sub>-e) emissions: A comparison between geopolymers and OPC cement concrete. *Constr. Build. Mater.* **2013**, doi:10.1016/j.conbuildmat.2013.01.023.
85. Mclellan, B.C.; Williams, R.P.; Lay, J.; Riessen, A. Van; Corder, G.D. Costs and carbon emissions for geopolymer pastes in comparison to ordinary portland cement. *J. Clean. Prod.* **2011**, *19*, 1080–1090, doi:10.1016/j.jclepro.2011.02.010.
86. Habert, G.; D'Espinose De Lacaillerie, J.B.; Roussel, N. An environmental evaluation of geopolymer based concrete production: Reviewing current research trends. *J. Clean. Prod.* **2011**, *19*, 1229–1238, doi:10.1016/j.jclepro.2011.03.012.
87. Assi, L.; Carter, K.; Deaver, E. (Eddie); Anay, R.; Ziehl, P. Sustainable concrete: Building a greener future. *J. Clean. Prod.* **2018**, *198*, 1641–1651, doi:10.1016/J.JCLEPRO.2018.07.123.
88. Carreño-Gallardo, C.; Tejeda-Ochoa, A.; Perez-Ordóñez, O.I.I.; Ledezma-Sillas, J.E.E.; Lardizabal-Gutierrez, D.; Prieto-Gomez, C.; Valenzuela-Grado, J.A.A.; Robles Hernandez, F.C.C.; Herrera-Ramirez, J.M.M. In the CO<sub>2</sub> emission remediation by means of alternative geopolymers as substitutes for cements. *J. Environ. Chem. Eng.* **2018**, *6*, 4878–4884, doi:10.1016/j.jece.2018.07.033.
89. Robayo-Salazar, R.; Mejía-Arcila, J.; Mejía de Gutiérrez, R.; Martínez, E. Life cycle assessment (LCA) of an alkali-activated binary concrete based on natural volcanic pozzolan: A comparative analysis to OPC concrete. *Constr. Build. Mater.* **2018**, *176*, 103–111, doi:10.1016/j.conbuildmat.2018.05.017.
90. Yang, K.-H.; Song, J.-K.; Song, K.-I. Assessment of CO<sub>2</sub> reduction of alkali-activated concrete. *J. Clean. Prod.* **2013**, *39*, 265–272, doi:10.1016/J.JCLEPRO.2012.08.001.
91. Teh, S.H.; Wiedmann, T.; Castel, A.; de Burgh, J. Hybrid life cycle assessment of greenhouse gas emissions from cement, concrete and geopolymer concrete in Australia. *J. Clean. Prod.* **2017**, *152*, 312–320, doi:10.1016/J.JCLEPRO.2017.03.122.
92. Wesseling, J.H.; Lechtenböhmer, S.; Åhman, M.; Nilsson, L.J.; Worrell, E.; Coenen, L. The transition of energy intensive processing industries towards deep decarbonization: Characteristics and implications for future research. *Renew. Sustain. Energy Rev.* **2017**, *79*, 1303–1313, doi:10.1016/j.rser.2017.05.156.
93. Georgiopoulou, M.; Lyberatos, G. Life cycle assessment of the use of alternative fuels in cement kilns: A case study. *J. Environ. Manage.* **2018**, *216*, 224–234, doi:10.1016/j.jenvman.2017.07.017.
94. Benhelal, E.; Zahedi, G.; Shamsaei, E.; Bahadori, A. Global strategies and potentials to curb CO<sub>2</sub> emissions in cement industry. *J. Clean. Prod.* **2013**, *51*, 142–161, doi:10.1016/j.jclepro.2012.10.049.
95. Ariyaratne, W.K.H.; Melaaen, M.C.; Eine, K.; Tokheim, L. a Meat and Bone Meal as a Renewable Energy Source in Cement Kilns: Investigation of Optimum Feeding Rate Key words. *Int. Conf. Renew. Energies Power Qual.* **2010**, 1–6.
96. Husillos Rodríguez, N.; Martínez-Ramírez, S.; Blanco-Varela, M.T.; Donatello, S.; Guillem, M.; Puig, J.; Fos, C.; Larrotcha, E.; Flores, J. The effect of using thermally dried sewage sludge as an alternative fuel on Portland cement clinker production. *J. Clean. Prod.* **2013**.
97. Rahman, A.; Rasul, M.G.; Khan, M.M.K.; Sharma, S.C. Assessment of energy performance and emission control using alternative fuels in cement industry through a process model. *Energies* **2017**, *10*, doi:10.3390/en10121996.
98. Kookos, I.K.; Pontikes, Y.; Angelopoulos, G.N.; Lyberatos, G. Classical and alternative fuel mix optimization in cement production using mathematical programming. *Fuel* **2011**, *90*, 1277–1284, doi:10.1016/j.fuel.2010.12.016.
99. Aranda Usón, A.; López-Sabirón, A.M.; Ferreira, G.; Llera Sastresa, E. Uses of alternative fuels and raw materials in the cement industry as sustainable waste management options. *Renew. Sustain. Energy Rev.* **2013**, doi:10.1016/j.rser.2013.02.024.

100. Galvez-Martos, J.-L.; Schoenberger, H. An analysis of the use of life cycle assessment for waste co-incineration in cement kilns. *Resour. Conserv. Recycl.* **2014**, *86*, 118–131, doi:10.1016/j.resconrec.2014.02.009.
101. Ishak, S.A.; Hashim, H.; Ting, T.S. Eco innovation strategies for promoting cleaner cement manufacturing. *J. Clean. Prod.* **2016**, *136*, 133–149, doi:10.1016/j.jclepro.2016.06.022.
102. Rootzén, J. Pathways to deep decarbonisation of carbon-intensive industry in the European Union Techno-economic assessments of key technologies and measures. **2015**.
103. Volkart, K.; Bauer, C.; Boulet, C. Life cycle assessment of carbon capture and storage in power generation and industry in Europe. *Int. J. Greenh. Gas Control* **2013**, *16*, 91–106, doi:10.1016/J.IJGGC.2013.03.003.
104. Hasanbeigi, A.; Morrow, W.; Masanet, E.; Sathaye, J.; Xu, T. Energy efficiency improvement and CO<sub>2</sub> emission reduction opportunities in the cement industry in China. *Energy Policy* **2013**, *57*, 287–297, doi:10.1016/j.enpol.2013.01.053.
105. Wyns, T.; Axelson, M. The Final Frontier – Decarbonising Europe’s energy intensive industries. *Inst. Eur. Stud.* **2016**, *64*, doi:10.1017/CBO9781107415324.004.
106. Energy Transition Commission *How to decarbonize energy systems through electrification - An analysis of electrification opportunities in transport, buildings and industry*; 2017;
107. Webb, K.C. Cementa och Vattenfall satsar på nollutsläpp - Press release 2018.
108. Lechtenböhmer, S.; Nilsson, L.J.; Åhman, M.; Schneider, C. Decarbonising the energy intensive basic materials industry through electrification – Implications for future EU electricity demand. *Energy* **2016**, *115*, 1623–1631, doi:10.1016/j.energy.2016.07.110.
109. Wörtler, M.; Dahlmann, P.; Schuler, F.; Bodo Lungen, H.; Voigt, N.; Ghenda, J.-T.; Schmidt, T. *Steel ’s Contribution to a Low-Carbon Europe 2050: Technical and Economic Analysis of the Sector’s CO<sub>2</sub> Abatement Potential*; 2013;
110. Material Economics The circular economy: A powerful force for climate mitigation. **2018**, 176, doi:10.1038/531435a.
111. Allwood, J.M.; Cullen, J.M. *Sustainable Materials With Both Open Eyes*; UIT Cambridge, 2012; ISBN 9781906860059.
112. Allwood, J.M. Transitions to material efficiency in the UK steel economy. *Philos. Trans. A. Math. Phys. Eng. Sci.* **2013**, *371*, 20110577, doi:10.1098/rsta.2011.0577.
113. Fleiter, T.; Herbst, A.; Rehfeldt, M.; Arens, M. *Industrial Innovation: Pathways to deep decarbonisation of Industry. Part 2: Scenario analysis and pathways to deep decarbonisation*; 2019;
114. Suopajarvi, H.; Umeki, K.; Mousa, E.; Hedayati, A.; Romar, H.; Kemppainen, A.; Wang, C.; Phounglamcheik, A.; Tuomikoski, S.; Norberg, N.; et al. Use of biomass in integrated steelmaking – Status quo, future needs and comparison to other low-CO<sub>2</sub> steel production technologies. *Appl. Energy* **2018**, *213*, 384–407, doi:10.1016/J.APENERGY.2018.01.060.
115. Abdul Quader, M.; Ahmed, S.; Dawal, S.Z.; Nukman, Y. Present needs, recent progress and future trends of energy-efficient Ultra-Low Carbon Dioxide (CO<sub>2</sub>) Steelmaking (ULCOS) program. *Renew. Sustain. Energy Rev.* **2016**, *55*, 537–549, doi:10.1016/J.RSER.2015.10.101.
116. Bianco, L.; Baracchini, G.; Cirilli, F. Sustainable Electric Arc Furnace Steel Production: GREENEAF. *BHM Berg-und Hüttenmännische Monatshefte* **2013**, *158*, 17–23, doi:10.1007/s00501-012-0101-0.
117. Wei, R.; Zhang, L.; Cang, D.; Li, J.; Li, X.; Xu, C.C. Current status and potential of biomass utilization in ferrous metallurgical industry. *Renew. Sustain. Energy Rev.* **2017**.
118. Toktarova, A.; Karlsson, I.; Rootzén, J.; Odenberger, M. *Technical Roadmap - Steel Industry*; 2020;
119. Toller, S. (Trafikverket) *Rapport: Klimatkalkyl – Beräkning av infrastrukturens klimatpåverkan och energianvändning i ett livscykelperspektiv, Modell 5.0 och 6.0*; 2018;
120. Worldsteel Association Steel and CO<sub>2</sub> – a global perspective.; 2017.
121. Celsa Steel Service AS *Environmental product declaration, Steel reinforcement products for concrete*; EPD International, 2012;
122. Mousa, E.; Wang, C.; Riesbeck, J.; Larsson, M. Biomass applications in iron and steel industry: An overview of challenges and opportunities. *Renew. Sustain. Energy Rev.* **2016**, *65*, 1247–1266, doi:10.1016/J.RSER.2016.07.061.
123. Fick, G.; Mirgaux, O.; Neau, P.; Patisson, F. Using biomass for pig iron production: A technical, environmental and economical assessment. *Waste and Biomass Valorization* **2014**, *5*, 43–55, doi:10.1007/s12649-013-9223-1.



124. Suopajarvi, H.; Kemppainen, A.; Haapakangas, J.; Fabritius, T. Extensive review of the opportunities to use biomass-based fuels in iron and steelmaking processes. *J. Clean. Prod.* **2017**, *148*, 709–734, doi:10.1016/j.jclepro.2017.02.029.
125. Jernkontoret *Klimatfärdplan För en fossilfri och konkurrenskraftig stålindustri i Sverige*; 2018;
126. Mandova, H.; Leduc, S.; Wang, C.; Wetterlund, E.; Patrizio, P.; Gale, W.; Kraxner, F. Possibilities for CO<sub>2</sub> emission reduction using biomass in European integrated steel plants. *Biomass and Bioenergy* **2018**, *115*, 231–243, doi:10.1016/j.biombioe.2018.04.021.
127. Norgate, T.; Haque, N.; Somerville, M.; Jahanshahi, S. Biomass as a source of renewable carbon for iron and steelmaking. *ISIJ Int.* **2012**, *52*, 1472–1481, doi:10.2355/isijinternational.52.1472.
128. Anheden, M.; Uhlir, L. *Roadmap 2015 to 2025 Biofuels for low-carbon steel industry - A report by RISE*; 2015;
129. van der Stel, J.; Louwerse, G.; Sert, D.; Hirsch, A.; Eklund, N.; Pettersson, M. Top gas recycling blast furnace developments for ‘green’ and sustainable ironmaking. *Ironmak. Steelmak.* **2013**, *40*, 483–489, doi:10.1179/0301923313Z.000000000221.
130. Fischedick, M.; Marzinkowski, J.; Winzer, P.; Weigel, M. Techno-economic evaluation of innovative steel production technologies. *J. Clean. Prod.* **2014**, *84*, 563–580, doi:10.1016/j.jclepro.2014.05.063.
131. Rootzén, J.; Johnsson, F. CO<sub>2</sub> emissions abatement in the Nordic carbon-intensive industry - An end-game in sight? *Energy* **2015**, doi:10.1016/j.energy.2014.12.029.
132. HYBRIT SSAB, LKAB and Vattenfall to build a globally-unique pilot plant for fossil-free steel - Press release Available online: <https://www.ssab.com/company/newsroom/media-archive/2018/02/01/06/31/ssab-lkab-and-vattenfall-to-build-a-globallyunique-pilot-plant-for-fossilfree-steel>.
133. Otto, A.; Robinius, M.; Grube, T.; Schiebahn, S.; Praktikno, A.; Stolten, D. Power-to-Steel: Reducing CO<sub>2</sub> through the Integration of Renewable Energy and Hydrogen into the German Steel Industry. *Energies* **2017**, *10*, doi:10.3390/en10040451.
134. Gunarathne, D.S.; Mellin, P.; Yang, W.; Pettersson, M.; Ljunggren, R. Performance of an effectively integrated biomass multi-stage gasification system and a steel industry heat treatment furnace. *Appl. Energy* **2016**, *170*, 353–361, doi:10.1016/j.apenergy.2016.03.003.
135. Johansson, M.T.; Söderström, M. Options for the Swedish steel industry - Energy efficiency measures and fuel conversion. *Energy* **2011**, *36*, 191–198, doi:10.1016/j.energy.2010.10.053.
136. Swedish Transport Administration *Gröna koncept inom asfaltsbeläggningar - Kunskapsöversikt*; 2015;
137. Thives, L.P.; Ghisi, E. Asphalt mixtures emission and energy consumption: A review. *Renew. Sustain. Energy Rev.* **2017**.
138. Said, S.; Jacobsson, T. *Cold asphalt pavements - Knowledge review: VTI Report 865*; 2015;
139. Hill, N.; Brannigan, C.; Wynn, D.; Milnes, R.; van Essen, H.; den Boer, E.; van Grinsven, A.; Ligthart, T.; van Gijlswijk, R. *EU Transport GHG: Routes to 2050 II. The role of GHG emissions from infrastructure construction, vehicle manufacturing, and ELVs in overall transport sector emissions*. *ons from infrastructure construction, vehicle manufacturing, and ELVs in overall transp*; 2012;
140. Balaguera, A.; Carvajal, G.I.; Albertí, J.; Fullana-i-Palmer, P. Life cycle assessment of road construction alternative materials: A literature review. *Resour. Conserv. Recycl.* **2018**, *132*, 37–48, doi:10.1016/j.resconrec.2018.01.003.
141. Tayh, S.A.; Muniandy, R.; Hassim, S.; Jakarni, F.; Aburkaba, E. An overview of utilization of bio-oil in hot mix asphalt. *WALIA J.* **2014**, *30*, 131–141.
142. Martinsson, K. (Trafikverket) *Asfaltdagen 2016 – Kristina Martinsson*; 2016.
143. Krouthen, C. (SLU) *Asfaltåtervinning och masshantering*, Swedish University of Agricultural Sciences, 2017.
144. Peng, B.; Fan, X.; Wang, X.; Li, W. Key steps of carbon emission and low-carbon measures in the construction of bituminous pavement. *Int. J. Pavement Res. Technol.* **2017**, *10*, 476–487, doi:10.1016/j.ijprt.2017.03.002.
145. Giani, M.I.; Dotelli, G.; Brandini, N.; Zampori, L. Comparative life cycle assessment of asphalt pavements using reclaimed asphalt, warm mix technology and cold in-place recycling. *Resour. Conserv. Recycl.* **2015**, *104*, 224–238, doi:10.1016/j.RESCONREC.2015.08.006.
146. Vidal, R.; Moliner, E.; Martínez, G.; Rubio, M.C. Life cycle assessment of hot mix asphalt and zeolite-based warm mix asphalt with reclaimed asphalt pavement. *Resour. Conserv. Recycl.* **2013**, *74*, 101–114, doi:10.1016/j.resconrec.2013.02.018.

147. Bloom, E.; Canton, A.; Pakes Ahlman, A.; Edil, T. Lifecycle assessment of highway reconstruction: A case study. *Transp. Res. Board* **2016**, 1–19.
148. Chen, X.; Wang, H. Life cycle assessment of asphalt pavement recycling for greenhouse gas emission with temporal aspect. *J. Clean. Prod.* **2018**, *187*, 148–157, doi:10.1016/j.jclepro.2018.03.207.
149. Aurangzeb, Q.; Al-Qadi, I.L.; Ozer, H.; Yang, R. Hybrid life cycle assessment for asphalt mixtures with high RAP content. *Resour. Conserv. Recycl.* **2014**, *83*, 77–86, doi:10.1016/j.resconrec.2013.12.004.
150. Celauro, C.; Corriere, F.; Guerrieri, M.; Lo Casto, B. Environmentally appraising different pavement and construction scenarios: A comparative analysis for a typical local road. *Transp. Res. Part D Transp. Environ.* **2015**, *34*, 41–51, doi:10.1016/j.trd.2014.10.001.
151. Del Ponte, K.; Madras Natarajan, B.; Pakes Ahlman, A.; Baker, A.; Elliott, E.; Edil, T.B. Life-cycle benefits of recycled material in highway construction. *Transp. Res. Rec.* **2017**, *2628*, 1–11, doi:10.3141/2628-01.
152. Bloom, E.; Horstmeier, G.J.; Ahlman, A.P.; Edil, T.B.; Whited, G. Assessing the Life Cycle Benefits of Recycled Material in Road Construction. In Proceedings of the Geotechnical Special Publication; 2016; Vol. 2016-Janua, pp. 613–622.
153. Chowdhury, R.; Apul, D.; Fry, T. A life cycle based environmental impacts assessment of construction materials used in road construction. *Resour. Conserv. Recycl.* **2010**, doi:10.1016/j.resconrec.2009.08.007.
154. Ferreira, V.J.; Sáez-De-Guinoa Vilaplana, A.; García-Armingol, T.; Aranda-Usón, A.; Lausín-González, C.; López-Sabirón, A.M.; Ferreira, G. Evaluation of the steel slag incorporation as coarse aggregate for road construction: technical requirements and environmental impact assessment. *J. Clean. Prod.* **2015**, doi:http://dx.doi.org/10.1016/j.jclepro.2015.08.094.
155. Dimter, S.; Rukavina, T.; Barišić, I. *Alternative, environmentally acceptable materials in road construction*; 2016; Vol. 3; ISBN 9781466696204.
156. Norgate, T.; Haque, N. The greenhouse gas impact of IPCC and ore-sorting technologies. *Miner. Eng.* **2013**, *42*, 13–21, doi:10.1016/j.mineng.2012.11.012.
157. Dylewski, R.; Adamczyk, J. Life cycle assessment (LCA) of building thermal insulation materials. *Eco-Efficient Constr. Build. Mater. Life Cycle Assess. (LCA), Eco-Labeling Case Stud.* **2013**, 267–286, doi:10.1533/9780857097729.2.267.
158. Zabalza Bribián, I.; Valero Capilla, A.; Aranda Usón, A. Life cycle assessment of building materials: Comparative analysis of energy and environmental impacts and evaluation of the eco-efficiency improvement potential. *Build. Environ.* **2011**, *46*, 1133–1140, doi:10.1016/j.buildenv.2010.12.002.
159. Schiavoni, S.; D'Alessandro, F.; Bianchi, F.; Asdrubali, F. Insulation materials for the building sector: A review and comparative analysis. *Renew. Sustain. Energy Rev.* **2016**, *62*, 988–1011, doi:10.1016/j.rser.2016.05.045.
160. *Isover Planet , people , prosperity - Our commitment to sustainable construction*; 2009;
161. Pargana, N.; Pinheiro, M.D.; Silvestre, J.D.; De Brito, J. Comparative environmental life cycle assessment of thermal insulation materials of buildings. *Energy Build.* **2014**, *82*, 466–481, doi:10.1016/j.enbuild.2014.05.057.
162. Kumari, L.M.; Kulatunga, U.; Madusanka, N.; Jayasena, N. Embodied Carbon Reduction Strategies for Buildings. In *ICSBE 2018*; Dissanayake, R., Mendis, P., Eds.; Springer Singapore, 2020; Vol. 44, pp. 162–170 ISBN 978-981-13-9748-6.
163. Bastante-Ceca; Cerezo-Narváez; Piñero-Vilela; Pastor-Fernández Determination of the Insulation Solution that Leads to Lower CO2 Emissions during the Construction Phase of a Building. *Energies* **2019**, *12*, 2400, doi:10.3390/en12122400.
164. Green Construction Board Low Carbon Routemap for the UK Built Environment. **2013**.
165. Lolli, N.; Hestnes, A.G. The influence of different electricity-to-emissions conversion factors on the choice of insulation materials. *Energy Build.* **2014**, *85*, 362–373, doi:10.1016/j.enbuild.2014.09.042.
166. Hill, C.; Norton, A.; Dibdiakova, J. A comparison of the environmental impacts of different categories of insulation materials. *Energy Build.* **2018**, *162*, 12–20, doi:10.1016/j.enbuild.2017.12.009.
167. Basbagill, J.; Flager, F.; Lepech, M.; Fischer, M. Application of life-cycle assessment to early stage building design for reduced embodied environmental impacts Application of life-cycle assessment to early stage building design for reduced embodied environmental impacts. *Build. Environ.* **2013**, *60*, 81–92, doi:10.1016/j.buildenv.2012.11.009.

168. Chau, C.K.; Leung, T.M.; Ng, W.Y. A review on life cycle assessment, life cycle energy assessment and life cycle carbon emissions assessment on buildings. *Appl. Energy* **2015**, *143*, 395–413, doi:10.1016/j.apenergy.2015.01.023.
169. Lasvaux, S.; Habert, G.; Peuportier, B.; Chevalier, J. Comparison of generic and product-specific Life Cycle Assessment databases: application to construction materials used in building LCA studies. **2015**, 1473–1490, doi:10.1007/s11367-015-0938-z.
170. Gerres, T.; Chaves Ávila, J.P.; Llamas, P.L.; San Román, T.G. A review of cross-sector decarbonisation potentials in the European energy intensive industry. *J. Clean. Prod.* **2019**, *210*, 585–601, doi:10.1016/j.jclepro.2018.11.036.
171. Pedreño-Rojas, M.A.; Flores-Colen, I.; De Brito, J.; Rodríguez-Liñán, C. Influence of the heating process on the use of gypsum wastes in plasters: Mechanical, thermal and environmental analysis. *J. Clean. Prod.* **2019**, *215*, 444–457, doi:10.1016/j.jclepro.2019.01.053.
172. Pedreño-Rojas, M.A.; Fořt, J.; Černý, R.; Rubio-de-Hita, P. Life cycle assessment of natural and recycled gypsum production in the Spanish context. *J. Clean. Prod.* **2020**, *253*, doi:10.1016/j.jclepro.2020.120056.
173. Fermacell GmbH Environmental Product Declaration - Gypsum Fibreboard Fermacell 2016, 1–6.
174. Quintana, A.; Alba, J.; del Rey, R.; Guillén-Guillamón, I. Comparative Life Cycle Assessment of gypsum plasterboard and a new kind of bio-based epoxy composite containing different natural fibers. *J. Clean. Prod.* **2018**, *185*, 408–420, doi:10.1016/j.jclepro.2018.03.042.
175. Erbs, A.; Nagalli, A.; Querne de Carvalho, K.; Mymrin, V.; Passig, F.H.; Mazer, W. Properties of recycled gypsum from gypsum plasterboards and commercial gypsum throughout recycling cycles. *J. Clean. Prod.* **2018**, *183*, 1314–1322, doi:10.1016/j.jclepro.2018.02.189.
176. Chan, Y.; Petithuguenin, L.; Fleiter, T.; Herbst, A.; Arens, M.; Stevenson, P. *Industrial Innovation: Pathways to deep decarbonisation of Industry. Part 1: Technology Analysis*; 2019;
177. Schneider, C.; Saurat, M.; Tönjes, A.; Zander, D.; Hanke, T.; Soukup, O.; Barthel, C.; Viebahn, P. *Decarbonisation pathways for key economic sectors*; 2020;
178. Steele, K.; Hurst, T.; Giesekam, J. *Green Construction Board Low Carbon Routemap for the Built Environment - 2015 Routemap Progress: Technical Report*;
179. CEMA; CECE CECE and CEMA: *Optimising our Industry to Reduce Emissions*; 2011;
180. Swedish Transport Administration Arbetsmaskinens klimatpåverkan och hur den kan minska - Ett underlag till 2050-arbetet; 2012;
181. Bondemark, A.; Jonsson, L. *Fossilfrihet för arbetsmaskiner - En rapport av WSP för Statens Energimyndighet*; 2017;
182. Rubenstone, J. *ENR (Engineering News-Record)*. 2016,.
183. Kittipongvises, S.; Chavalparit, O.; Sutthirath, C. Greenhouse gases and energy intensity of granite rock mining operations in Thailand: A case of industrial rock-construction. *Environ. Clim. Technol.* **2016**, *18*, 64–75, doi:10.1515/rtuct-2016-0014.
184. Swedish Energy Agency *Drivmedel 2017 redovisning av uppgifter enligt drivmedelslagen och hållbarhetslagen*; 2018;
185. Weber, C.; Amundsen, A.H. Fornybare drivstoffer – Fornybar diesel : HVO - TOI rapport 1475/2016. **2016**.
186. Karavalakis, G.; Jiang, Y.; Yang, J.; Durbin, T.; Nuottimäki, J.; Lehto, K. Emissions and Fuel Economy Evaluation from Two Current Technology Heavy-Duty Trucks Operated on HVO and FAME Blends. *SAE Int. J. Fuels Lubr.* **2016**, *9*, 2016-01-0876, doi:10.4271/2016-01-0876.
187. Naturvårdsverket *Arbetsmaskiner Inventering av utsläpp, teknikstatus och prognos*; 2007;
188. Cao, T.; Russell, R.L.; Durbin, T.D.; Cocker, D.R.; Burnette, A.; Calavita, J.; Maldonado, H.; Johnson, K.C. Characterization of the emissions impacts of hybrid excavators with a portable emissions measurement system (PEMS)-based methodology. *Sci. Total Environ.* **2018**, *635*, 112–119, doi:10.1016/J.SCIOTENV.2018.04.011.
189. Bedotti, A.; Campanini, F.; Pastori, M.; Riccò, L.; Casoli, P. Energy saving solutions for a hydraulic excavator. In *Proceedings of the Energy Procedia*; Elsevier B.V., 2017; Vol. 126, pp. 1099–1106.
190. Kumar, S.; Das, S.; Ghoshal, S.K.; Das, J. Review of Different Energy Saving Strategies Applicable to Hydraulic Hybrid Systems Used in Heavy Vehicles. In *Proceedings of the IOP Conference Series: Materials Science and Engineering*; 2018; Vol. 377.
191. Li, T.; Liu, H.; Ding, D. Predictive energy management of fuel cell supercapacitor hybrid construction equipment. *Energy* **2018**, *149*, 718–729, doi:10.1016/J.ENERGY.2018.02.101.

192. Lajunen, A. Energy Efficiency of Conventional, Hybrid Electric, and Fuel Cell Hybrid Powertrains in Heavy Machinery. *SAE Tech. Pap.* **2015**, 2015-01-2829, doi:10.4271/2015-01-2829.
193. Salman, O.; Chen, Y. Comparative Environmental Analysis of Conventional and Hybrid Wheel Loader Technologies - A Life Cycle Perspective. **2013**.
194. Uhlin, E.; Unneback, J. On electrification of mass excavation. *2013 IEEE Transp. Electrification Conf. Expo Components, Syst. Power Electron. - From Technol. to Bus. Public Policy, ITEC 2013* **2013**, doi:10.1109/ITEC.2013.6573503.
195. Preston Aragonès, M.; Serafimova, T. *Zero Emission Construction Sites: The Possibilities and Barriers of Electric Construction Machinery - Bellona Europa*; 2018;
196. Berg, H.; Johansson, P.; Matic, A.; Steen, B. *Exploring future energy storage systems for construction machineries - A sustainability review*; 2015;
197. Avetisyan, H.G.; Asce, M.; Miller-hooks, E.; Melanta, S. Decision Models to Support Greenhouse Gas Emissions Reduction from Transportation Construction Projects. *Am. Soc. Civ. Eng.* **2012**, *138*, 631–641, doi:10.1061/(ASCE)CO.1943-7862.0000477.
198. Jassim, H.; Krantz, J.; Lu, W.; Olofsson, T. A cradle-to-gate framework for optimizing material production in road construction. In *Proceedings of the IABSE Congress Stockholm, 2016: Challenges in Design and Construction of an Innovative and Sustainable Built Environment*; 2016; pp. 771–777.
199. Kim, B.; Lee, H.; Park, H.; Kim, H. Greenhouse gas emissions from onsite equipment usage in road construction. *J. Constr. Eng. Manag.* **2012**, *138*, 982–990, doi:10.1061/(ASCE)CO.1943-7862.0000515.
200. Bascetin, A.; Adiguzel, D.; Tuyulu, S. The investigation of CO2 emissions for different rock units in the production of aggregate. *Environ. Earth Sci.* **2017**, *76*, doi:10.1007/s12665-017-6602-0.
201. Hossain, M.U.; Poon, C.S.; Lo, I.M.C.; Cheng, J.C.P. Comparative environmental evaluation of aggregate production from recycled waste materials and virgin sources by LCA. *Resour. Conserv. Recycl.* **2016**, *109*, 67–77, doi:10.1016/j.resconrec.2016.02.009.
202. Krantz, J.; Lu, W.; Johansson, T.; Olofsson, T. Analysis of alternative road construction staging approaches to reduce carbon dioxide emissions. *J. Clean. Prod.* **2017**, *143*, 980–988, doi:10.1016/j.jclepro.2016.12.023.
203. WRAP Cutting embodied carbon in construction projects. **2013**, 9.
204. Delgado, O.; Rodríguez, F.; Muncrief, R. Fuel Efficiency Technology in European Heavy-Duty Vehicles: Baseline and Potential for the 2020-2030 Time Frame. *ICCT White Pap.* **2017**.
205. Gao, Z.; Smith, D.E.; Stuart Daw, C.; Dean Edwards, K.; Kaul, B.C.; Domingo, N.; Parks, J.E.; Jones, P.T. The evaluation of developing vehicle technologies on the fuel economy of long-haul trucks. *Energy Convers. Manag.* **2015**, *106*, 766–781, doi:10.1016/j.enconman.2015.10.006.
206. IEA The Future of Trucks. *Oecd/International Energy Agency* **2017**.
207. Skinner, I.; van Essen, H.; Smokers, H.; Hill, N. *Towards the decarbonisation of EU's transport sector by 2050*; 2010;
208. Nykvist, B.; Olson, O. *Decarbonizing road freight systems: stakeholder-generate scenarios for deep emission reductions in Sweden*; 2019;
209. Lhomme, W.; Bouscayrol, A.; Syed, S.A.; Roy, S.; Gailly, F.; Pape, O. Energy Savings of a Hybrid Truck Using a Ravigneaux Gear Train. *IEEE Trans. Veh. Technol.* **2017**, *66*, 8682–8692, doi:10.1109/TVT.2017.2710378.
210. Zhao, H.; Burke, A.; Miller, M. Analysis of Class 8 truck technologies for their fuel savings and economics. *Transp. Res. Part D Transp. Environ.* **2013**, *23*, 55–63, doi:10.1016/j.trd.2013.04.004.
211. Quiros, D.C.; Smith, J.; Thiruvengadam, A.; Huai, T.; Hu, S. Greenhouse gas emissions from heavy-duty natural gas, hybrid, and conventional diesel on-road trucks during freight transport. *Atmos. Environ.* **2017**, *168*, 36–45, doi:10.1016/j.atmosenv.2017.08.066.
212. Chen, L.; Geng, C.; Song, J. Modeling and simulation of a novel HEV automatic transmission system for heavy duty vehicles. In *Proceedings of the Proceedings of the 29th Chinese Control and Decision Conference, CCDC 2017*; 2017; pp. 1368–1372.
213. Sen, B.; Ercan, T.; Tatari, O. Does a battery-electric truck make a difference? – Life cycle emissions, costs, and externality analysis of alternative fuel-powered Class 8 heavy-duty trucks in the United States. *J. Clean. Prod.* **2017**, *141*, 110–121, doi:10.1016/j.jclepro.2016.09.046.
214. Çabukoglu, E.; Georges, G.; Küng, L.; Pareschi, G.; Boulouchos, K. Battery electric propulsion: an option for heavy-duty vehicles? Results from a Swiss case-study. *Transp. Res. Part C Emerg. Technol.* **2018**, *88*, 107–123, doi:10.1016/j.trc.2018.01.013.

215. Zhao, H.; Burke, A.; Zhu, L. Analysis of Class 8 hybrid-electric truck technologies using diesel, LNG, electricity, and hydrogen, as the fuel for various applications. *2013 World Electr. Veh. Symp. Exhib. EVS 2014* **2014**, 1–16, doi:10.1109/EVS.2013.6914957.
216. Nykvist, B.; Sprei, F.; Nilsson, M. Assessing the progress toward lower priced long range battery electric vehicles. *Energy Policy* **2019**, *124*, 144–155, doi:10.1016/j.enpol.2018.09.035.

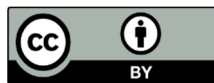

© 2020 by the authors. Submitted for possible open access publication under the terms and conditions of the Creative Commons Attribution (CC BY) license (<http://creativecommons.org/licenses/by/4.0/>).
